# Supplementary material
Source: PubMed Central journal article supplement (PMC4583798)

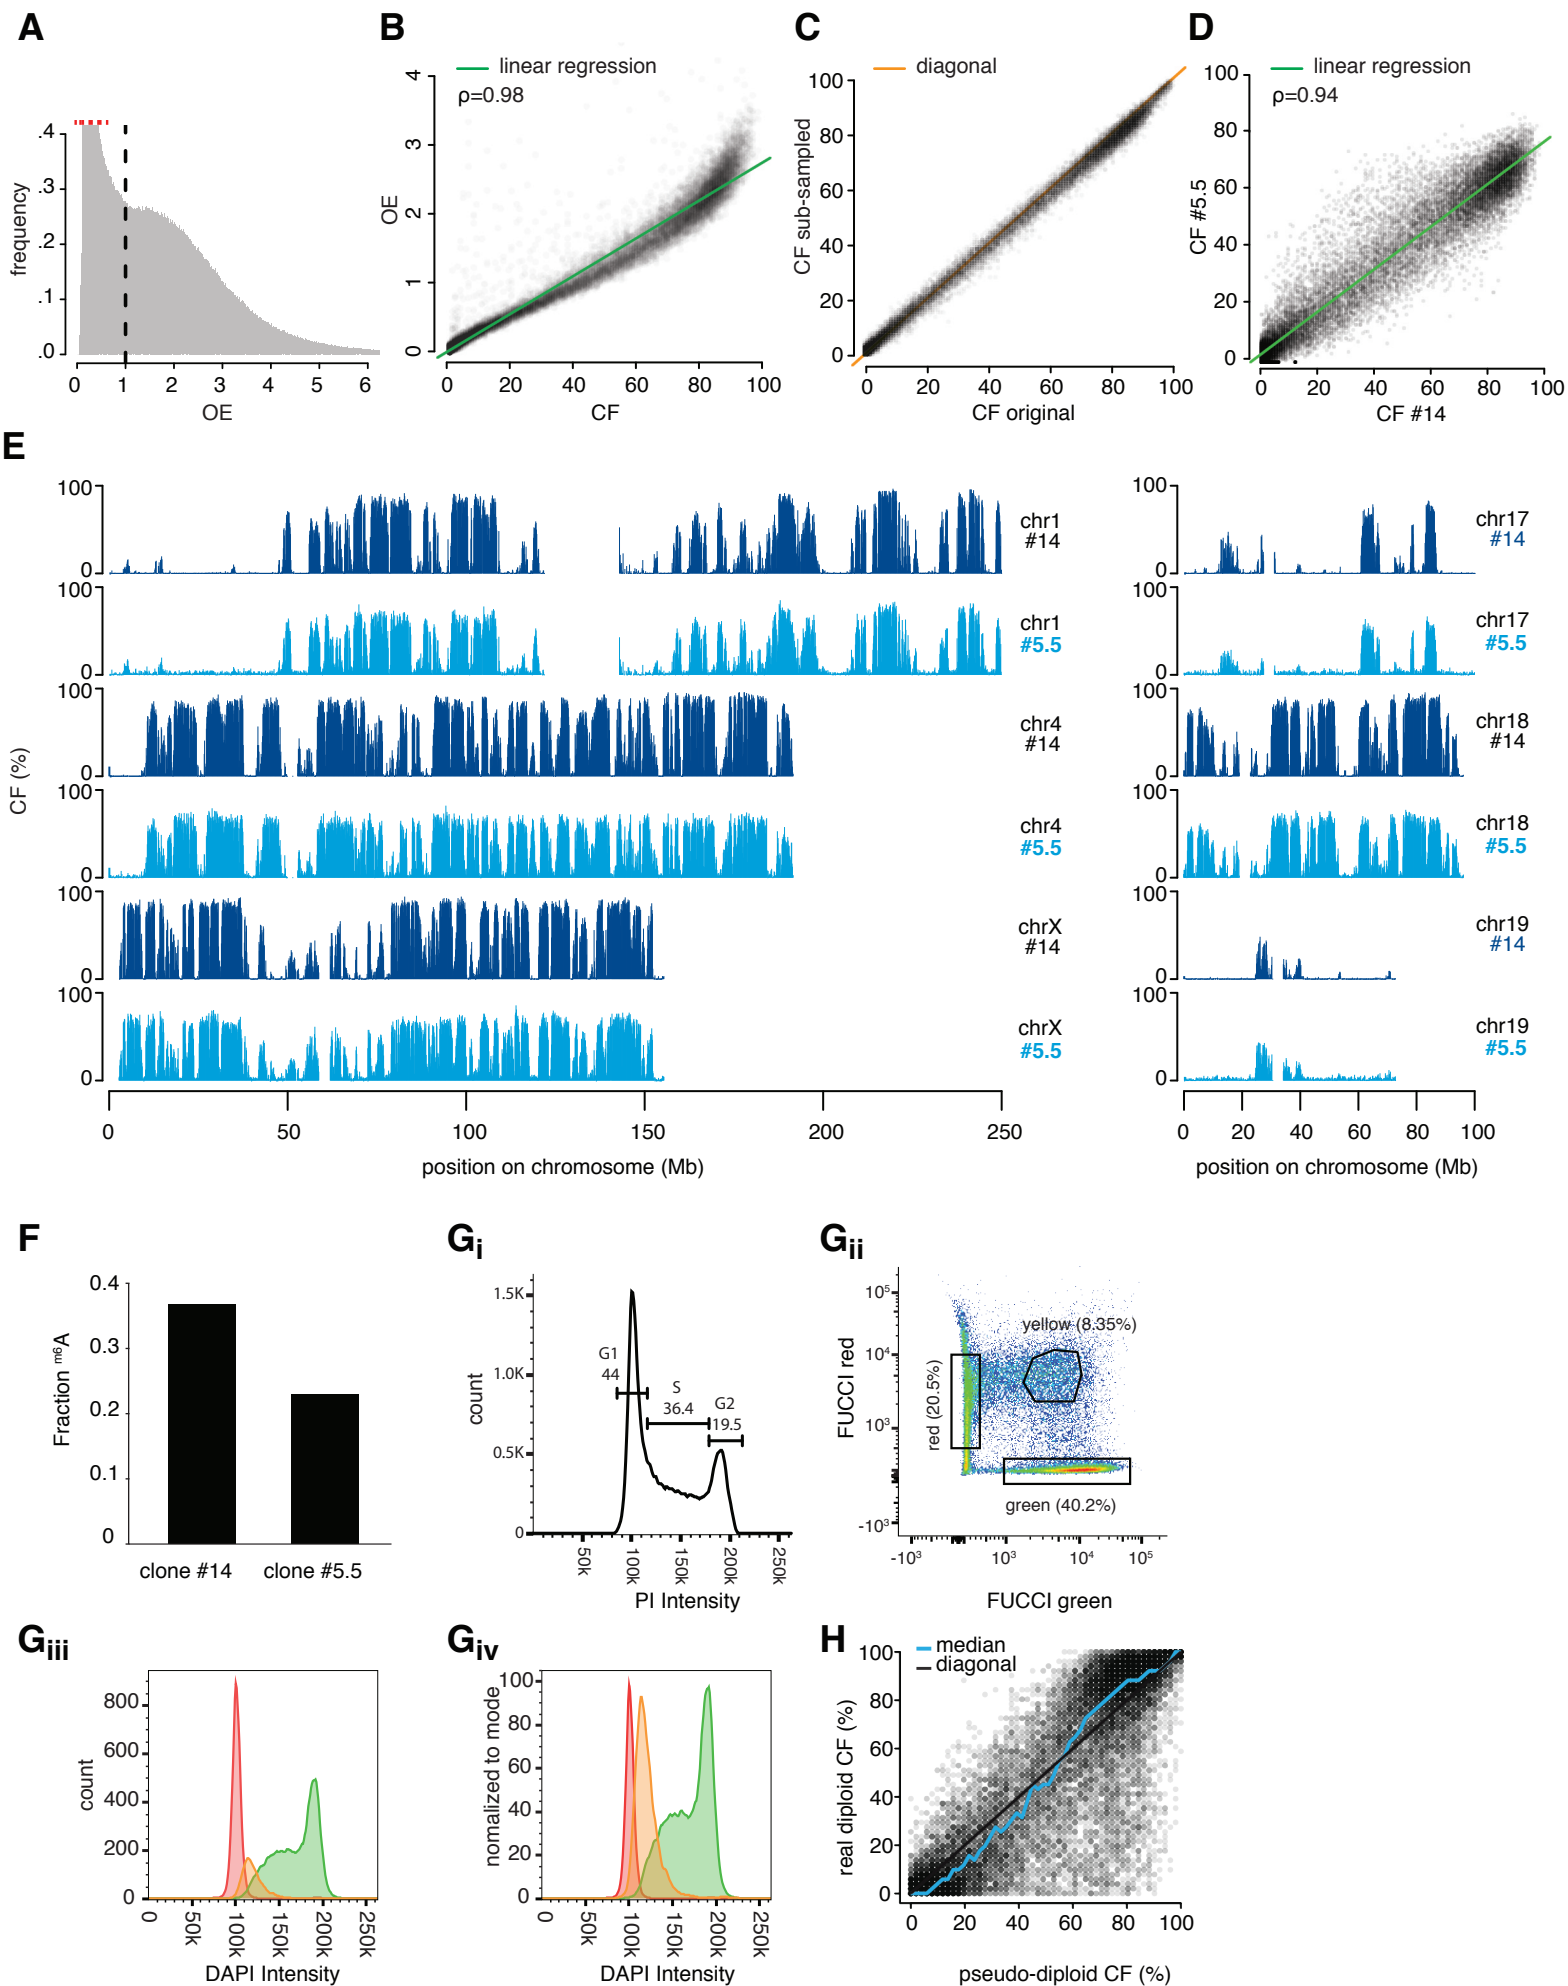

Supplement: NIHMS718969-supplement-3.pdf [file NIHMS718969-supplement-3.pdf]

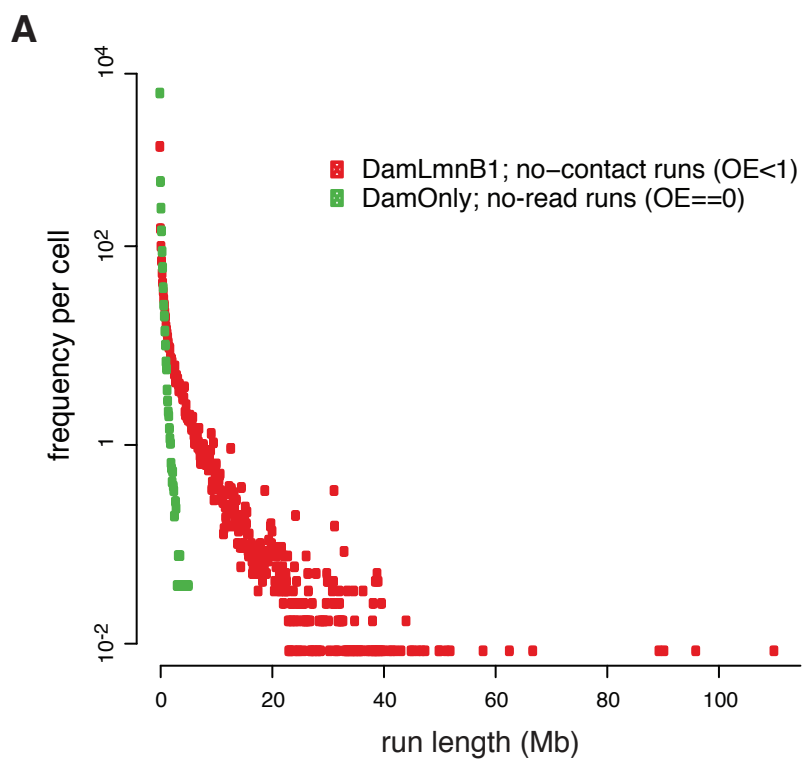

Supplement: NIHMS718969-supplement-4.pdf [file NIHMS718969-supplement-4.pdf]

Kind et al, Supplementary Figure S4

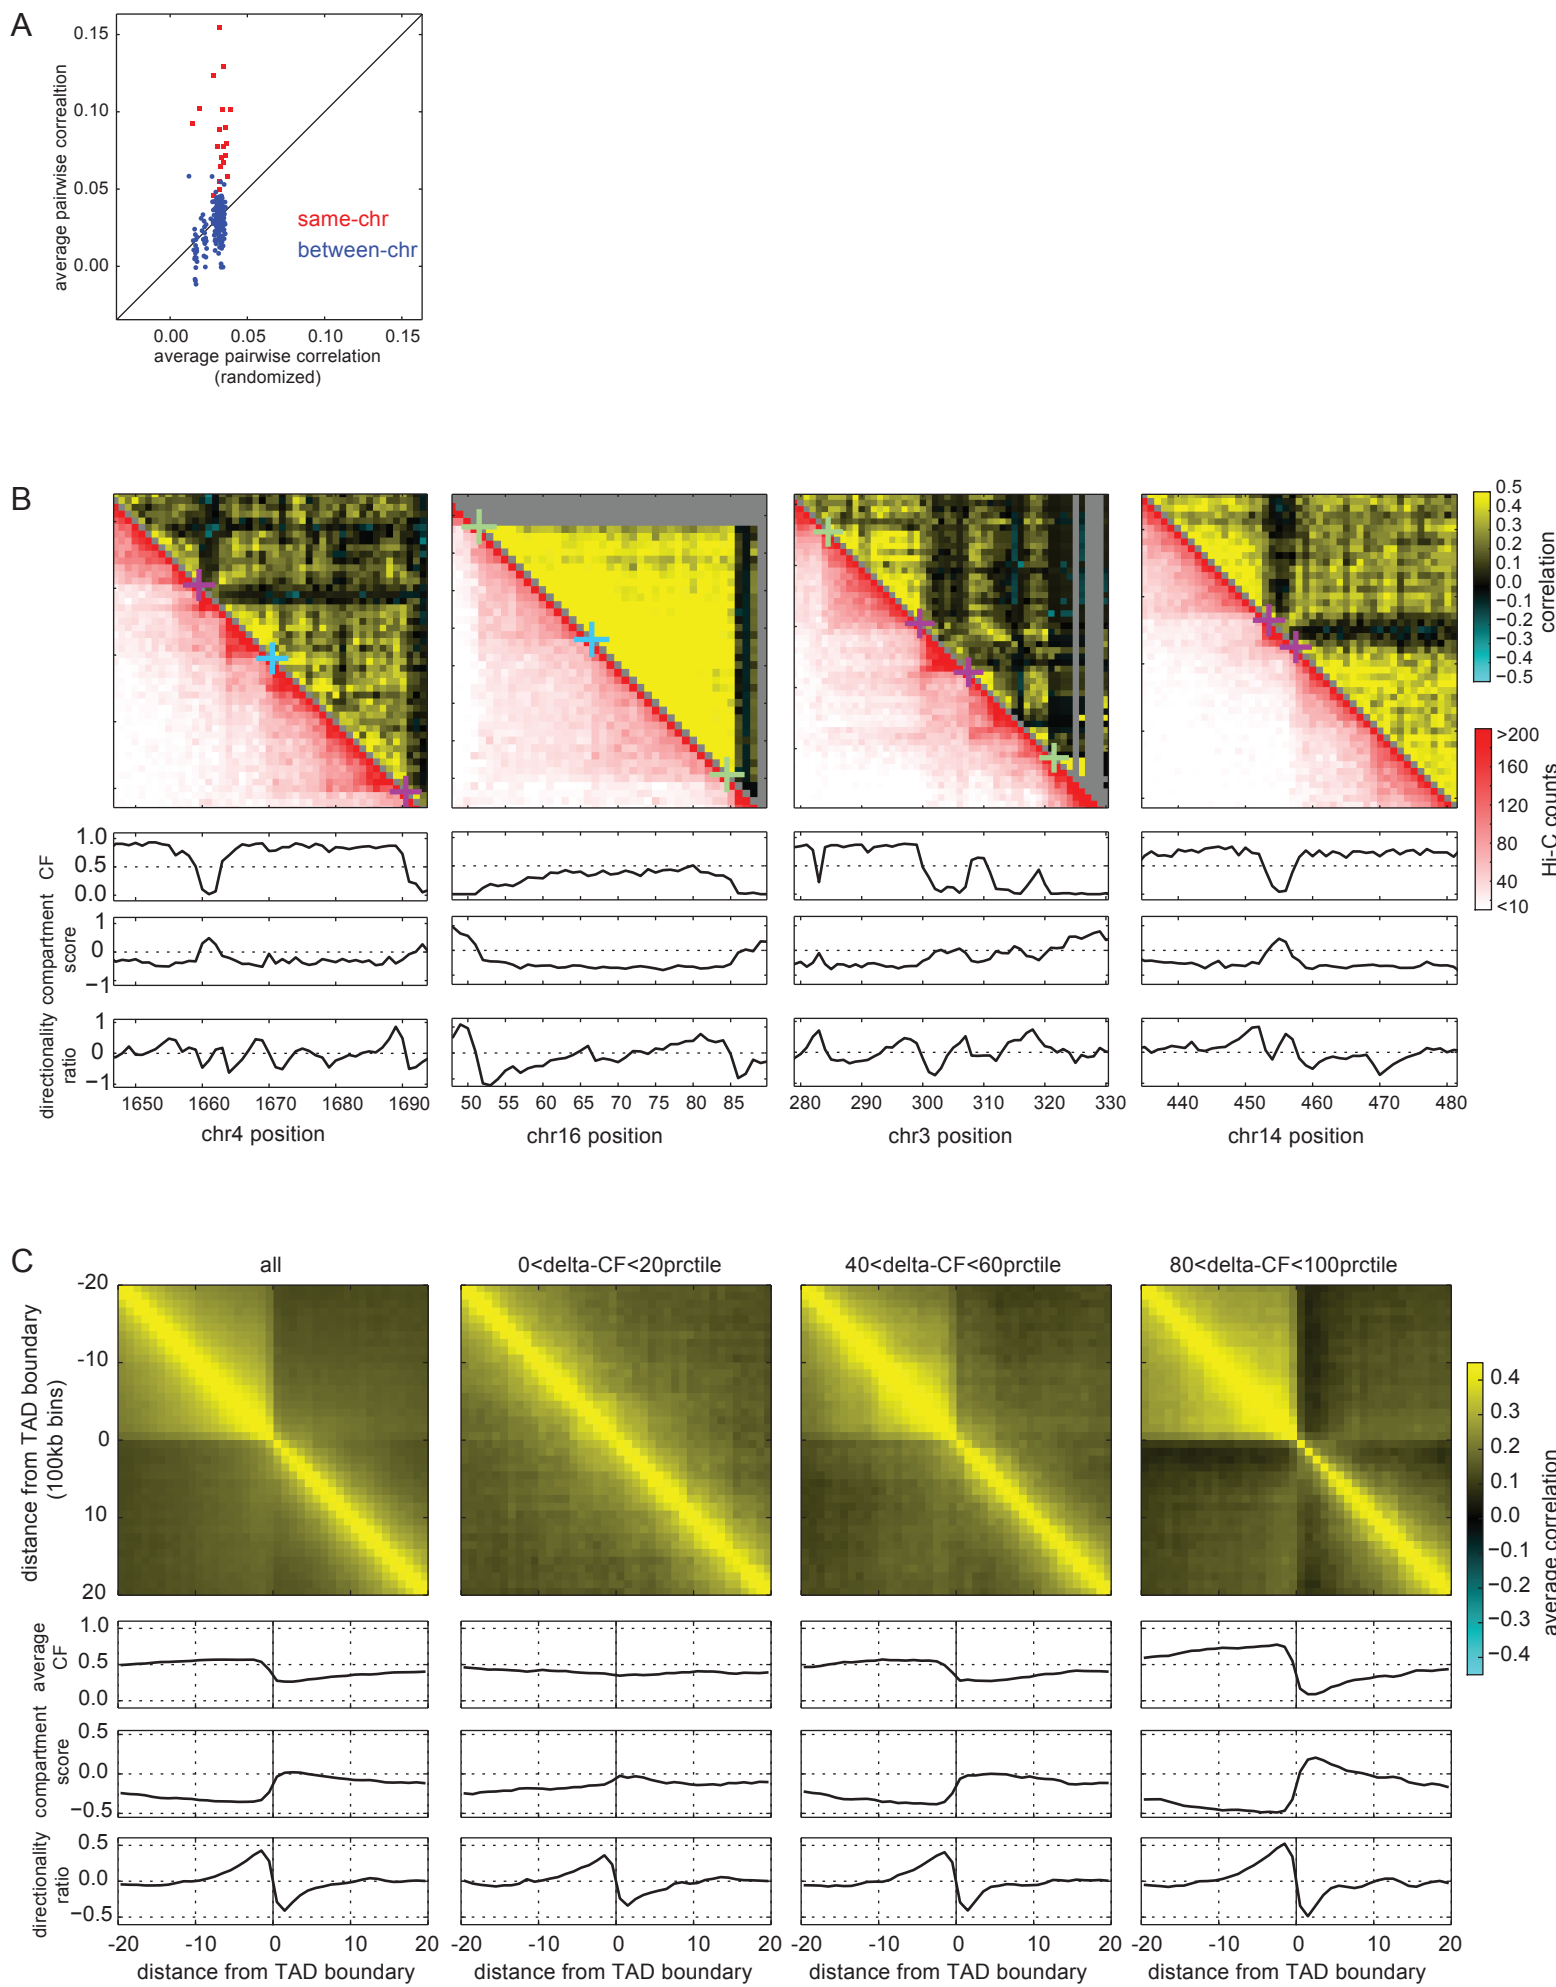

Supplement: NIHMS718969-supplement-5.pdf [file NIHMS718969-supplement-5.pdf]

Kind et al, Figure S5

**A**

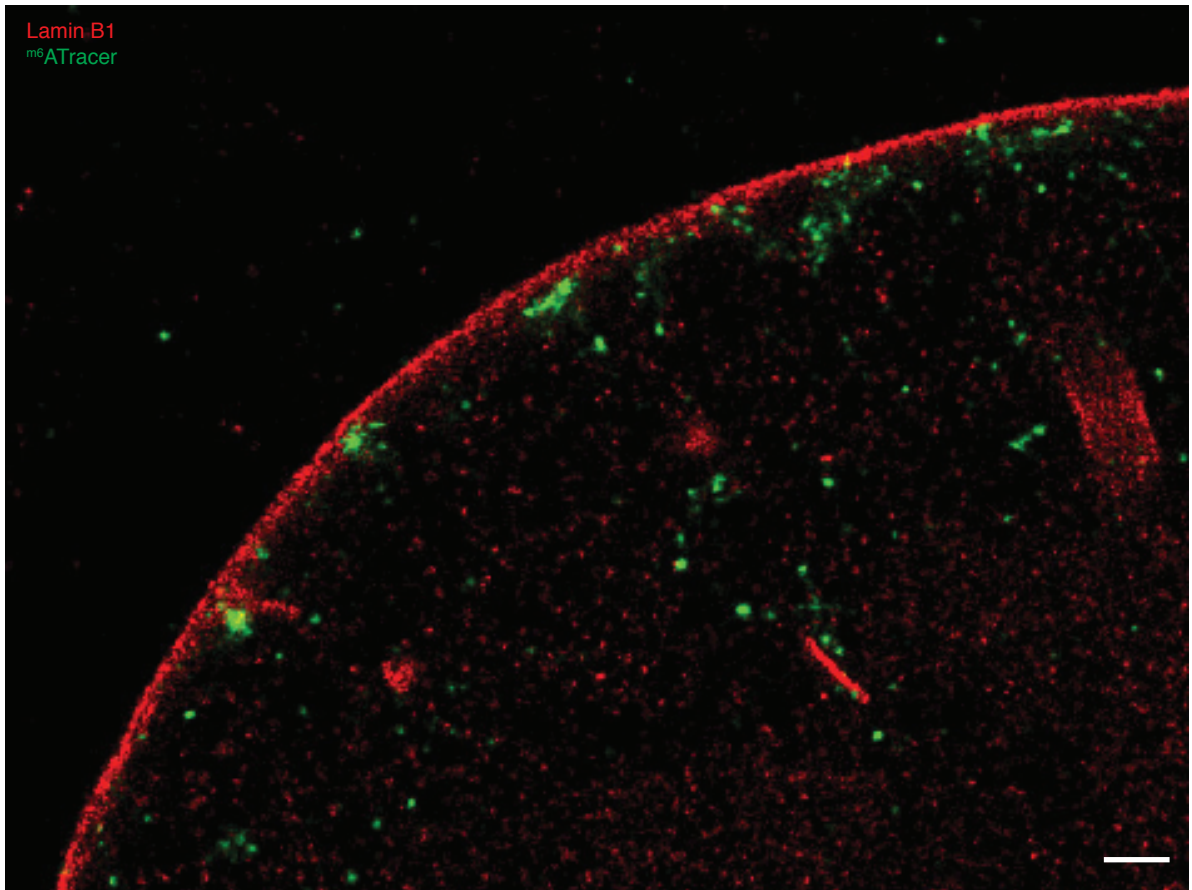

**B**

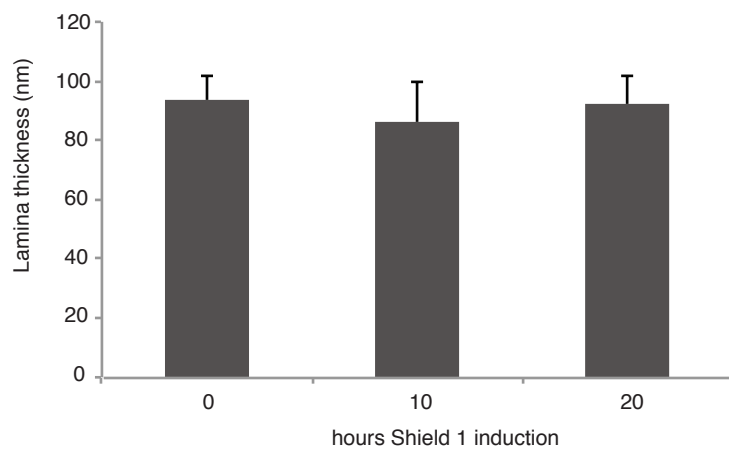

Supplement: NIHMS718969-supplement-6.pdf [file NIHMS718969-supplement-6.pdf]

Kind et al, Figure S6

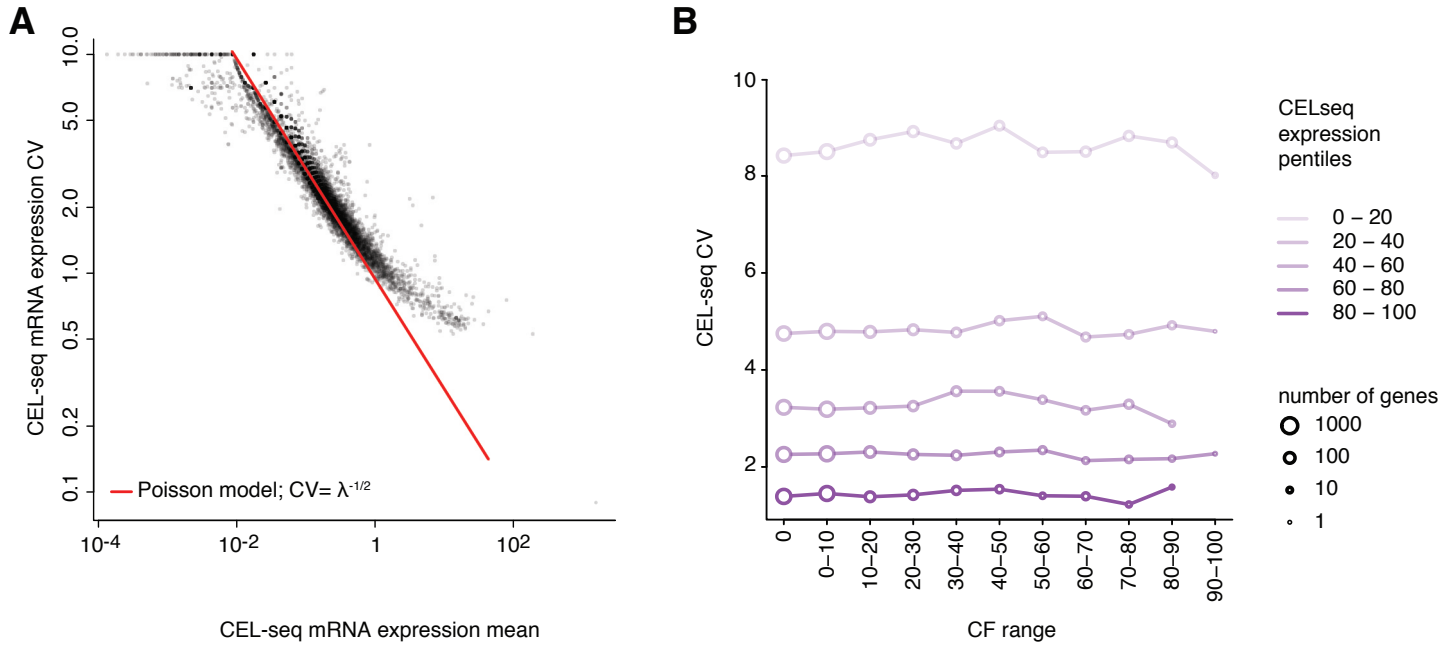

Supplement: NIHMS718969-supplement-7.pdf [file NIHMS718969-supplement-7.pdf]
